# Supplementary material for: MyD88 and TLR4 Expression in Epithelial Ovarian Cancer
Source: PubMed Central journal article supplement — Mayo Clin Proc. Author manuscript; Available in PMC 2018 Mar 27. (PMC5870793; doi:10.1016/j.mayocp.2017.10.023), 2018-03
Supplement: NIHMS949194-supplement.pdf [file NIHMS949194-supplement.pdf]

## **Block MS, Vierkant RA, Rambau PF, et al. MyD88 and TLR4 Expression in Epithelial Ovarian Cancer.**

### **Supplemental Methods**

We used analyses of variance and chi-square tests as appropriate to compare expression levels with clinical and prognostic variables. Our primary outcome variable was overall survival, defined as time from diagnosis to death from any cause, censoring follow-up at 10 years to minimize competing causes of mortality and accounting for possible left truncation due to delayed study enrollment. Kaplan-Meier curves and corresponding log-rank (Mantel-Cox) tests were used to visually compare survival across levels of expression. We used Cox proportional hazards regression to estimate hazard ratios (HRs) and 95% confidence intervals (CIs) for association of expression categories with survival. We ran unadjusted and adjusted analyses, with the latter including age at diagnosis (continuous), stage (I/II, III/IV, unknown), and study site as adjustment terms in order to minimize potential confounding effects. Separate analyses were carried out by histotype and among selected histological groupings. The secondary outcome of interest was progression-free survival defined as time from diagnosis to first disease progression, again censoring follow-up at 10 years and accounting for possible left truncation. We tested the proportional hazards assumption for all primary analyses. On subsets of HGSOCs with additional clinical details, we also conducted analysis by extent of residual disease following initial debulking surgery (available for 66% of patients), germline pathogenic *BRCA1* and *BRCA2* mutation status (available for 28% of patients), and confirmed use of standard first-line chemotherapy (available for 12% of patients). *P* value reporting adheres to journal requirements; more detail on statistical significance is available upon request.

**Supplemental Figure 1. Patient exclusions**

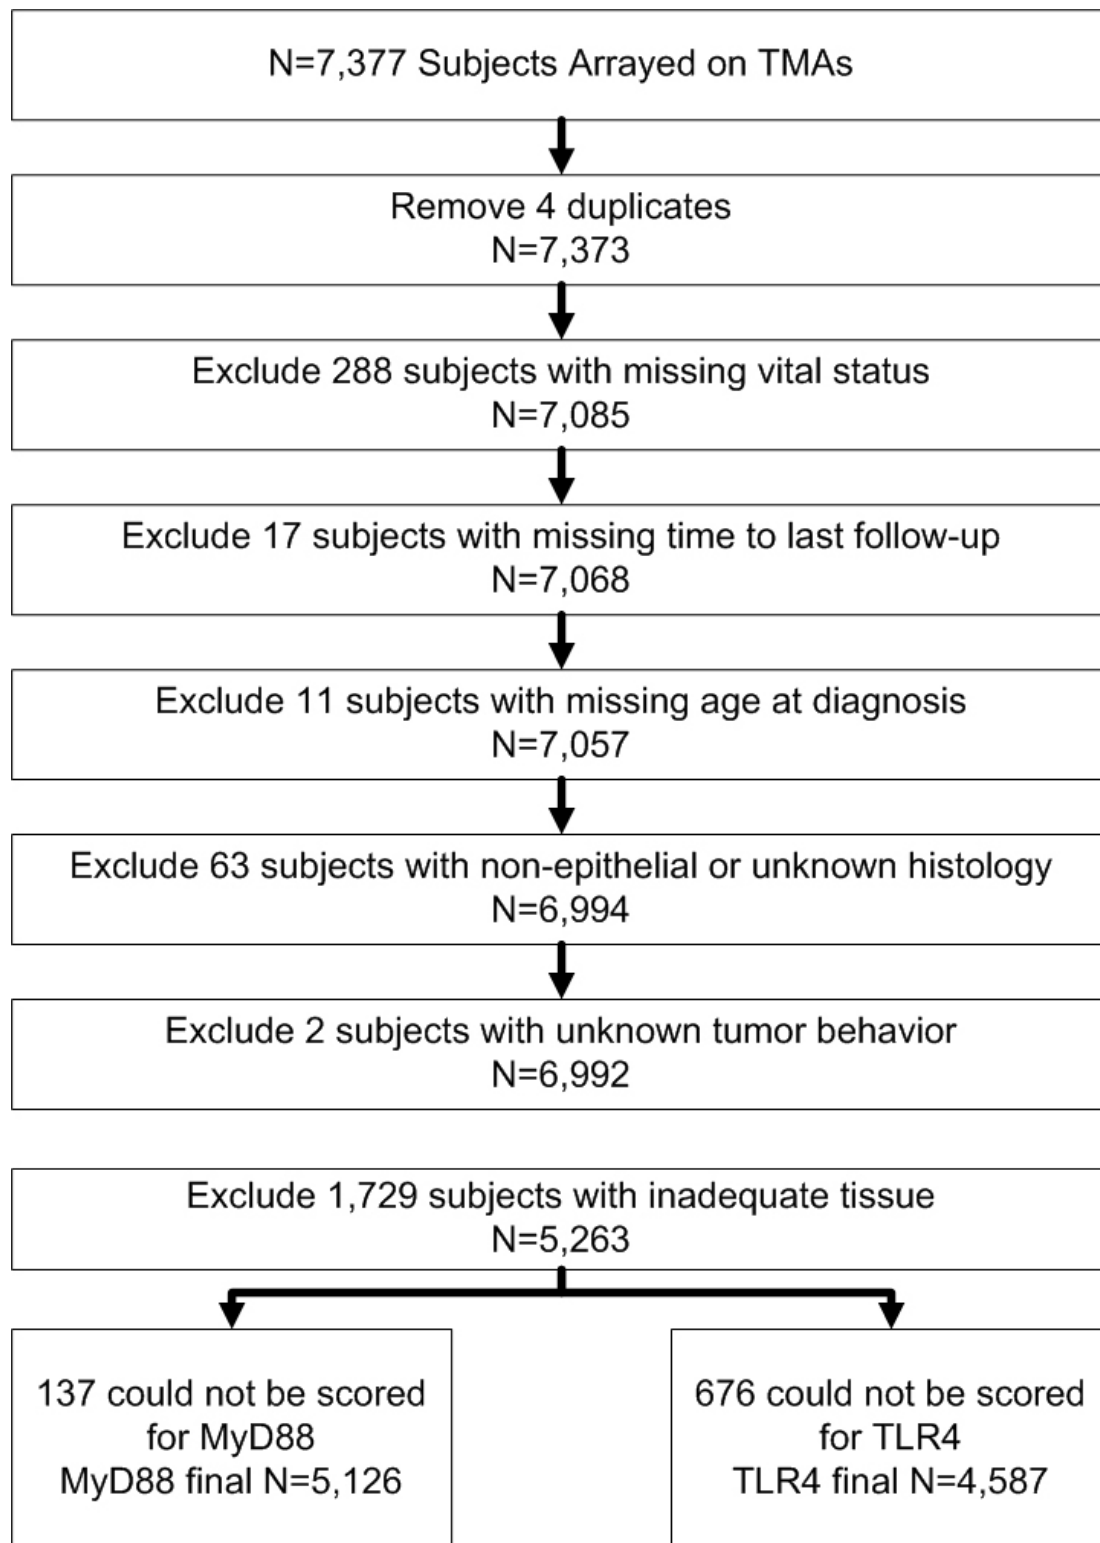

**Supplemental Table 1. Participating epithelial ovarian cancer studies**

| Study | Name                                                            | Reference | Location  | Years     | Ascertainment of Patients and Clinical Data                                                                   | Pathology Data and Review                                                                                                                | N (%)       | High-grade serous N (%) |
|-------|-----------------------------------------------------------------|-----------|-----------|-----------|---------------------------------------------------------------------------------------------------------------|------------------------------------------------------------------------------------------------------------------------------------------|-------------|-------------------------|
| VAN   | Vancouver Ovarian Cancer Study                                  | (1, 2)    | Canada    | 1984-2000 | Ovarian Cancer Registry serving British Columbia and the Cheryl Brown Outcomes Unit                           | Central review of pathology reports and histological slides by University of British Columbia pathologists                               | 1,021 (19%) | 595 (21%)               |
| AOV   | Alberta Ovarian Tumor Types Study                               | (3)       | Canada    | 1978-2010 | Population-based Alberta Cancer Registry; annual updates are performed for vital statistics                   | Pathology reports and histological slides review by the study pathologist                                                                | 580 (11%)   | 77 (3%)                 |
| SEA   | Study of Epidemiology and Risk Factors in Cancer Heredity       | (4)       | UK        | 1998-2008 | Eastern Region Cancer Intelligence Unit, West Midlands Cancer Intelligence Unit, and multiple cancer networks | Pathology reports and histological slides reviewed by study pathologist                                                                  | 537 (10%)   | 260 (9%)                |
| NOT   | Nottingham Study                                                | (5)       | UK        | 1991-2011 | Hospital records and Trent cancer registry                                                                    | Pathology reports reviewed by gynecologic pathologist                                                                                    | 451 (9%)    | 261 (9%)                |
| STA   | Genetic Epidemiology of Ovarian Cancer Study                    | (6)       | US        | 1997-2001 | Greater Bay Area Cancer Registry                                                                              | Pathology reports and histological slides reviewed by study pathologist                                                                  | 411 (8%)    | 169 (6%)                |
| MAY   | Mayo Clinic Ovarian Cancer Study                                | (7)       | US        | 2009-2013 | Mayo Clinic medical records and death certificates                                                            | Pathology reports and histologic slides reviewed by Mayo Clinic gynecologic pathologists                                                 | 315 (6%)    | 250 (9%)                |
| LAX   | Women's Cancer Research Program - Cedars-Sinai Medical Center   | (8)       | US        | 1989-2009 | Women's Cancer Program Biorepository                                                                          | Pathology reports and histological slides reviewed by the Department of Pathology and Laboratory Medicine at Cedars-Sinai Medical Center | 246 (5%)    | 243 (8%)                |
| BAV   | Bavarian Ovarian Cancer Study                                   | (9)       | Germany   | 2002-2006 | Gynecologic Oncology Center at the Comprehensive Cancer Center Erlangen-Nuremberg                             | Centralized review of pathology reports and histological slides for all patients by study pathologists                                   | 230 (4%)    | 137 (5%)                |
| WMH   | Westmead Hospital, Gynaecological Oncology Biobank (GynBiobank) | (10)      | Australia | 1992-2014 | The Crown Princess Mary Cancer Centre and affiliated hospitals                                                | Pathology reports and diagnostic slides reviewed by panel of gynecologic pathologists                                                    | 199 (4%)    | 133 (5%)                |
| TUE   | Tuebingen University Hospital                                   | -         | Germany   | 1999-2008 | Department of Obstetrics and Gynaecology, Eberhard Karls Universitats Tubingen, Tubingen Germany           | Pathology reports and histologic slides reviewed by gynecologic pathologist                                                              | 192 (4%)    | 151 (5%)                |
| POC   | Polish Ovarian Cancer Study                                     | (11)      | Poland    | 2000-2003 | Hospital records and cancer registries serving Warsaw and Lodz                                                | Histological slides reviewed by study pathologist                                                                                        | 142 (3%)    | 83 (3%)                 |
| HAW   | Hawaii Ovarian Cancer Study                                     | (12, 13)  | US        | 1993-2008 | Hawaii Tumor Registry and medical records                                                                     | Pathology reports and histological slides reviewed by study pathologist                                                                  | 129 (2%)    | 60 (2%)                 |
| CNI   | CNIO Ovarian Cancer Study                                       | (14)      | Spain     | 2006-2013 | Hospitals in Madrid in Medical Oncology Divisions                                                             | Pathology information was obtained from medical charts of the patients used in the Medical Oncology Units                                | 127 (2%)    | 57 (2%)                 |
| BRZ   | Ribeirao Preto Ovarian Cancer Study                             | -         | Brazil    | 1987-2010 | University Hospital of Ribeirao Preto School of Medicine (HCRP), case series with prospective follow up       | Pathology reports and histologic slides reviewed by HCRP gynecologic pathologists                                                        | 115 (2%)    | 59 (2%)                 |
| UKO   | United Kingdom                                                  | (15)      | UK        | 2006-2010 | Ten major Gynecologic Oncology NHS                                                                            | Central review of pathology reports by                                                                                                   | 105 (2%)    | 58 (2%)                 |

| Study | Name                                   | Reference | Location  | Years     | Ascertainment of Patients and Clinical Data                                                                                                                                             | Pathology Data and Review                                                                                                                                                                                                                                                                                                                                                                                                                               | N (%)    | High-grade serous N (%) |
|-------|----------------------------------------|-----------|-----------|-----------|-----------------------------------------------------------------------------------------------------------------------------------------------------------------------------------------|---------------------------------------------------------------------------------------------------------------------------------------------------------------------------------------------------------------------------------------------------------------------------------------------------------------------------------------------------------------------------------------------------------------------------------------------------------|----------|-------------------------|
|       | Ovarian Cancer Population study        |           |           |           | centers in England, Wales and Northern Ireland; cancer registries; NHS Information Centre for Health and Social Care (England and Wales) and Central Services Agency (Northern Ireland) | gynecologic oncologist                                                                                                                                                                                                                                                                                                                                                                                                                                  |          |                         |
| CAL   | Calgary Serous Carcinoma Study         | (16)      | Canada    | 2003-2007 | Hospital based retrospective observational study                                                                                                                                        | Histological review of all slides by study pathologist supported by centralized biomarker analysis                                                                                                                                                                                                                                                                                                                                                      | 106 (2%) | 76 (3%)                 |
| AOC   | Australian Ovarian Cancer Study        | (17)      | Australia | 2002-2006 | Treatment centers throughout Australia; cancer registries serving Queensland, South and West Australia; regular follow-up by medical record review                                      | Pathology reports and diagnostic slides reviewed by panel of gynecologic pathologists                                                                                                                                                                                                                                                                                                                                                                   | 95 (2%)  | 91 (3%)                 |
| GER   | Germany Ovarian Cancer Study           | (18)      | Germany   | 1993-1996 | 26 hospitals in the study regions                                                                                                                                                       | Pathology reports were requested from the respective pathology institutes. Tissue samples were provided by the tissue bank of the National Center for Tumor Diseases (NCT, Heidelberg, Germany) in accordance with the regulations of the tissue bank and the approval of the ethics committee of Heidelberg University and by other pathology institutes. Histological slides were reviewed by gynecologic pathologist at the University of Heidelberg | 85 (2%)  | 41 (1%)                 |
| MAL   | Malignant Ovarian Cancer Study         | (19, 20)  | Denmark   | 1994-1999 | Gynecological departments in Copenhagen, Frederiksberg and 7 surrounding counties                                                                                                       | Review of pathology reports for all patients and histological slides for 30% by gynecologic pathologist                                                                                                                                                                                                                                                                                                                                                 | 66 (1%)  | 7 (1%)                  |
| SOC   | Southampton Ovarian Cancer Study       | (21)      | UK        | 1993-1998 | Hospitals in the Wessex region of southern England                                                                                                                                      | Original pathology report                                                                                                                                                                                                                                                                                                                                                                                                                               | 68 (1%)  | 31 (1%)                 |
| HOP   | Hormones and Ovarian Cancer PrEdiction | (22)      | US        | 2003-2009 | Hospital registries and active surveillance of medical practices in Western PA, Northeastern OH, and Western NY                                                                         | Medical chart review for all cases                                                                                                                                                                                                                                                                                                                                                                                                                      | 43 (1%)  | 26 (1%)                 |
|       |                                        |           |           |           |                                                                                                                                                                                         |                                                                                                                                                                                                                                                                                                                                                                                                                                                         | 5,263    | 2,865                   |

#### References

1. Prentice LM, Klausen C, Kalloger S, Kobel M, McKinney S, Santos JL, et al. Kisspeptin and GPR54 immunoreactivity in a cohort of 518 patients defines favourable prognosis and clear cell subtype in ovarian carcinoma. *BMC Med* 2007;5:33.
2. Kobel M, Reuss A, Bois A, Kommoss S, Kommoss F, Gao D, et al. The biological and clinical value of p53 expression in pelvic high-grade serous carcinomas. *J Pathol* 2010;222(2):191-8.
3. Köbel M, Madore J, Ramus SJ, Clarke BA, Pharoah PDP, Deen S, et al. Evidence for a time-dependent association between FOLR1 expression and survival from ovarian carcinoma: Implications for clinical testing. An Ovarian Tumor Tissue Analysis consortium study. *Br J Cancer* 2014;111(12):2297-307.
4. Song H, Ramus SJ, Quaye L, Dicioccio RA, Tyrer J, Lomas E, et al. Common variants in mismatch repair genes and risk of invasive ovarian cancer. *Carcinogenesis* 2006;27(11):2235-42.
5. Williams E, Martin S, Moss R, Durrant L, Deen S. Co-expression of VEGF and CA9 in ovarian high-grade serous carcinoma and relationship to survival. *Virchows Arch* 2012;461(1):33-9.
6. McGuire V, Felberg A, Mills M, Ostrow KL, DiCioccio R, John EM, et al. Relation of contraceptive and reproductive history to ovarian cancer risk in carriers and noncarriers of BRCA1 gene mutations. *Am J Epidemiol* 2004;160(7):613-8.
7. Goode EL, Chenevix-Trench G, Hartmann LC, Fridley BL, Kalli KR, Vierkant RA, et al. Assessment of hepatocyte growth factor in ovarian cancer mortality. *Cancer Epidemiol Biomarkers Prev* 2011;20(8):1638-48.

8. Ramus SJ, Antoniou AC, Kuchenbaecker KB, Soucy P, Beesley J, Chen X, et al. Ovarian cancer susceptibility alleles and risk of ovarian cancer in BRCA1 and BRCA2 mutation carriers. *Human Mutation* 2012;33(4):690-702.
9. Hein A, Thiel FC, Bayer CM, Fasching PA, Haberle L, Lux MP, et al. Hormone replacement therapy and prognosis in ovarian cancer patients. *Eur J Cancer Prev* 2013;22(1):52-8.
10. Emmanuel C, Chiew YE, George J, Etemadmoghadam D, Anglesio MS, Sharma R, et al. Genomic classification of serous ovarian cancer with adjacent borderline differentiates RAS pathway and TP53-mutant tumors and identifies NRAS as an oncogenic driver. *Clin Cancer Res* 2014;20(24):6618-30.
11. Garcia-Closas M, Brinton LA, Lissowska J, Richesson D, Sherman ME, Szeszenia-Dabrowska N, et al. Ovarian cancer risk and common variation in the sex hormone-binding globulin gene: a population-based case-control study. *BMC Cancer* 2007;7:60.
12. Goodman MT, Lurie G, Thompson PJ, McDuffie KE, Carney ME. Association of two common single-nucleotide polymorphisms in the CYP19A1 locus and ovarian cancer risk. *Endocr Relat Cancer* 2008;15(4):1055-60.
13. Lurie G, Wilkens LR, Thompson PJ, McDuffie KE, Carney ME, Terada KY, et al. Genetic polymorphisms in the Paraoxonase 1 gene and risk of ovarian epithelial carcinoma. *Cancer Epidemiol Biomarkers Prev* 2008;17(8):2070-7.
14. Kamieniak MM, Rico D, Milne RL, Munoz-Repeto I, Ibanez K, Grillo MA, et al. Deletion at 6q24.2-26 predicts longer survival of high-grade serous epithelial ovarian cancer patients. *Mol Oncol* 2015;9(2):422-36.
15. Balogun N, Gentry-Maharaj A, Wozniak EL, Lim A, Ryan A, Ramus SJ, et al. Recruitment of newly diagnosed ovarian cancer patients proved challenging in a multicentre biobanking study. *J Clin Epidemiol* 2011;64(5):525-30.
16. Bromley AB, Altman AD, Chu P, Nation JG, Nelson GS, Ghatage P, et al. Architectural patterns of ovarian/pelvic high-grade serous carcinoma. *Int J Gynecol Pathol* 2012;31(5):397-404.
17. Merritt MA, Green AC, Nagle CM, Webb PM. Talcum powder, chronic pelvic inflammation and NSAIDs in relation to risk of epithelial ovarian cancer. *Int J Cancer* 2008;122(1):170-6.
18. Peterlongo P, Chang-Claude J, Moysich KB, Rudolph A, Schmutzler RK, Simard J, et al. Candidate genetic modifiers for breast and ovarian cancer risk in BRCA1 and BRCA2 mutation carriers. *Cancer Epidemiology, Biomarkers and Prevention* 2015;24(1):308-16.
19. Glud E, Kjaer SK, Thomsen BL, Hogdall C, Christensen L, Hogdall E, et al. Hormone therapy and the impact of estrogen intake on the risk of ovarian cancer. *Arch Intern Med* 2004;164(20):2253-9.
20. Soegaard M, Jensen A, Hogdall E, Christensen L, Hogdall C, Blaakaer J, et al. Different risk factor profiles for mucinous and nonmucinous ovarian cancer: results from the Danish MALOVA study. *Cancer Epidemiol Biomarkers Prev* 2007;16(6):1160-6.
21. Baxter SW, Choong DY, Eccles DM, Campbell IG. Transforming growth factor beta receptor 1 polyalanine polymorphism and exon 5 mutation analysis in breast and ovarian cancer. *Cancer epidemiology, biomarkers & prevention : a publication of the American Association for Cancer Research, cosponsored by the American Society of Preventive Oncology* 2002;11(2):211-4.
22. Lo-Ciganic WH, Zgibor JC, Bunker CH, Moysich KB, Edwards RP, Ness RB. Aspirin, nonaspirin nonsteroidal anti-inflammatory drugs, or acetaminophen and risk of ovarian cancer. *Epidemiology* 2012;23(2):311-9.

**Supplemental Table 2. Clinical characteristics of 5,263 epithelial ovarian cancer patients**

|                                                   | <b>Mean (range)</b> |
|---------------------------------------------------|---------------------|
| Age at diagnosis, years                           | 58.0 (16-95)        |
| Time to study entry, months                       | 4.9 (0-118.7)       |
| Time to last follow-up, months                    | 58.4 (0.1-119.9)    |
|                                                   | <b>N (%)</b>        |
| Tumor behavior                                    |                     |
| Invasive                                          | 4,995 (95%)         |
| Borderline (atypical proliferative)               | 268 (5%)            |
| Histology                                         |                     |
| High-grade serous                                 | 2,865 (54%)         |
| Endometrioid                                      | 670 (13%)           |
| Clear cell                                        | 616 (12%)           |
| Mucinous                                          | 355 (7%)            |
| Low-grade serous                                  | 188 (4%)            |
| Mucinous borderline                               | 129 (2%)            |
| Serous borderline                                 | 127 (2%)            |
| Mixed histology                                   | 114 (2%)            |
| Serous, unknown-grade                             | 7 (<1%)             |
| Endometrioid borderline                           | 10 (<1%)            |
| Clear cell borderline                             | 1 (<1%)             |
| Undifferentiated/poorly differentiated epithelial | 67 (<1%)            |
| Unknown, but known to be epithelial               | 65 (1%)             |
| Other specified epithelial                        | 48 (1%)             |
| Other specified epithelial borderline             | 1 (<1%)             |
| Stage                                             |                     |
| FIGO I, II                                        | 2,222 (44%)         |
| FIGO III, IV                                      | 2,837 (56%)         |
| Unknown                                           | 204                 |
| Grade                                             |                     |
| High                                              | 4,001 (76%)         |
| Low                                               | 703 (24%)           |
| Not Applicable/Unknown                            | 559                 |
| Race                                              |                     |
| White                                             | 2,262 (76%)         |
| Presumed white                                    | 375 (13%)           |
| Asian                                             | 177 (6%)            |
| Black                                             | 32 (1%)             |
| Other                                             | 113 (4%)            |
| Unknown                                           | 2,304               |
| Ethnicity                                         |                     |
| Not Hispanic                                      | 2,883 (98%)         |
| Hispanic                                          | 54 (2%)             |
| Unknown                                           | 2,326               |
| Vital status at last follow-up                    |                     |
| Living                                            | 2,494 (47%)         |
| Deceased                                          | 2,769 (53%)         |

FIGO, International Federation of Gynecologic Oncologists

**Supplemental Table 3. Distributions of MyD88 and TLR4 expression by histopathological group, N (row %)**

|                                       | MYD88 Expression |             | TLR4 Expression |             | Total |
|---------------------------------------|------------------|-------------|-----------------|-------------|-------|
|                                       | Weak             | Strong      | Weak            | Strong      |       |
| All invasive                          | 1,414 (29%)      | 3,450 (71%) | 1,456 (33%)     | 2,960 (67%) | 4,995 |
| Serous                                | 763 (26%)        | 2,201 (74%) | 779 (29%)       | 1,894 (71%) | 3,060 |
| High-grade serous                     | 712 (26%)        | 2,064 (74%) | 734 (29%)       | 1,788 (71%) | 2,865 |
| Low-grade serous                      | 49 (27%)         | 133 (73%)   | 42 (29%)        | 103 (71%)   | 188   |
| Endometrioid                          | 213 (32%)        | 447 (68%)   | 169 (28%)       | 443 (72%)   | 670   |
| Grade 1 endometrioid                  | 108 (33%)        | 219 (67%)   | 62 (20%)        | 252 (80%)   | 329   |
| Grade 2/3 endometrioid                | 101 (31%)        | 220 (69%)   | 105 (37%)       | 182 (63%)   | 328   |
| Clear cell                            | 250 (41%)        | 358 (59%)   | 335 (60%)       | 226 (40%)   | 616   |
| Mucinous                              | 95 (28%)         | 249 (72%)   | 79 (26%)        | 224 (74%)   | 355   |
| All borderline                        | 67 (26%)         | 195 (74%)   | 45 (26%)        | 126 (74%)   | 268   |
| Serous borderline                     | 40 (33%)         | 82 (67%)    | 12 (30%)        | 28 (70%)    | 127   |
| Mucinous borderline                   | 22 (17%)         | 106 (83%)   | 29 (24%)        | 90 (76%)    | 129   |
| Serous borderline or invasive         | 803 (26%)        | 2,283 (74%) | 792 (29%)       | 1,922 (71%) | 3,187 |
| Mucinous borderline or invasive       | 118 (25%)        | 355 (75%)   | 108 (26%)       | 314 (74%)   | 484   |
| Low-grade serous or serous borderline | 89 (29%)         | 215 (71%)   | 55 (30%)        | 131 (70%)   | 315   |
| Overall                               | 1,481 (29%)      | 3,645 (71%) | 1,501 (33%)     | 3,086 (67%) | 5,263 |

Numbers do not sum to total due to inclusion in sub-groups indicated by indentation as well as inclusion of patients with missing MYD88 or TLR4 expression or with tumors of unknown grade, histotype, or tumor behavior where appropriate.

**Supplemental Table 4. Associations of MyD88 and TLR4 expression with clinical features of HGSOC**

|                                   | MyD88       |             |                      | TLR4        |             |          |
|-----------------------------------|-------------|-------------|----------------------|-------------|-------------|----------|
|                                   | Weak        | Strong      | <i>P</i>             | Weak        | Strong      | <i>P</i> |
| Age, mean (SD)                    | 60.5 (11.0) | 60.7 (11.2) | 0.65                 | 60.0 (11.4) | 60.6 (11.2) | 0.16     |
| Tumor stage                       |             |             | $2.7 \times 10^{-4}$ |             |             | 0.75     |
| I-II                              | 172 (25%)   | 373 (18%)   |                      | 141 (20%)   | 336 (19%)   |          |
| III-IV                            | 517 (75%)   | 1,651 (82%) |                      | 572 (80%)   | 1,422 (81%) |          |
| Extent of residual disease        |             |             |                      |             |             |          |
| Macroscopic disease               | 274 (60%)   | 800 (59%)   | 0.77                 | 292 (59%)   | 687 (59%)   | 0.88     |
| No macroscopic disease            | 185 (40%)   | 561 (41%)   |                      | 207 (41%)   | 476 (41%)   |          |
| Pathogenic mutation status        |             |             |                      |             |             |          |
| Tested negative                   | 152 (81%)   | 485 (81%)   | 0.78                 | 147 (79%)   | 444 (81%)   | 0.84     |
| Pathogenic <i>BRCA1</i> mutation  | 23 (12%)    | 82 (14%)    |                      | 27 (15%)    | 71 (13%)    |          |
| Pathogenic <i>BRCA2</i> mutation  | 13 (7%)     | 35 (6%)     |                      | 11 (6%)     | 31 (6%)     |          |
| First line chemotherapy treatment |             |             |                      |             |             |          |
| Standard treatment                | 59 (8%)     | 280 (14%)   | $2.6 \times 10^{-4}$ | 102 (14%)   | 231 (13%)   | 0.55     |
| Unknown treatment                 | 653 (92%)   | 1,784 (86%) |                      | 632 (86%)   | 2,189 (87%) |          |

HGSOC, high-grade serous ovarian cancer; adjusted for study, age (continuous), and stage (I/II, III/IV, unknown); mutation status reflects results of germline testing; standard treatment includes patients receiving  $\geq$  four cycles of intra-venous carboplatin AUC 5 or 6 and paclitaxel 135 mg/m<sup>2</sup> or 175 mg/m<sup>2</sup> every three weeks and patients receiving  $\geq$  four cycles of intra-venous carboplatin and paclitaxel every three weeks with dose presumed to be carboplatin AUC 5 or 6 and paclitaxel 135 mg/m<sup>2</sup> or 175 mg/m<sup>2</sup>; HR, hazard ratio, CI, confidence interval; N (%) unless otherwise specified; *P* from analysis of variance or chi-square testing, as appropriate.



**Supplemental Table 5. Multivariate-adjusted association of combined MyD88 and TLR4 expression and overall survival among HGSOC cases by extent of residual disease, by pathogenic mutation status, and by first line chemotherapy**

|                                          | MyD88  | TLR4   | N   | N events | HR (95% CI)      | P     |
|------------------------------------------|--------|--------|-----|----------|------------------|-------|
| <b>Extent of Residual Disease</b>        |        |        |     |          |                  |       |
| Macroscopic disease                      | Weak   | Weak   | 105 | 69       | ref              | 0.13  |
|                                          |        | Strong | 115 | 92       | 1.35 (0.96,1.89) |       |
|                                          | Strong | Weak   | 180 | 144      | 1.32 (0.98,1.78) |       |
|                                          |        | Strong | 561 | 475      | 1.40 (1.06,1.85) |       |
| No macroscopic disease                   | Weak   | Weak   | 64  | 32       | ref              | 0.11  |
|                                          |        | Strong | 76  | 41       | 0.81 (0.50,1.31) |       |
|                                          | Strong | Weak   | 121 | 68       | 1.30 (0.84,2.01) |       |
|                                          |        | Strong | 373 | 177      | 0.92 (0.61,1.40) |       |
| <b>Pathogenic Mutation Status</b>        |        |        |     |          |                  |       |
| Tested negative                          | Weak   | Weak   | 44  | 25       | ref              | 0.22  |
|                                          |        | Strong | 82  | 54       | 1.34 (0.81,2.22) |       |
|                                          | Strong | Weak   | 96  | 69       | 1.40 (0.87,2.26) |       |
|                                          |        | Strong | 345 | 253      | 1.56 (1.00,2.44) |       |
| Pathogenic <i>BRCA1</i> mutation         | Weak   | Weak   | 7   | 3        | ref              | 0.052 |
|                                          |        | Strong | 12  | 5        | 0.69 (0.15,3.18) |       |
|                                          | Strong | Weak   | 16  | 5        | 0.27 (0.05,1.62) |       |
|                                          |        | Strong | 55  | 35       | 1.12 (0.25,5.05) |       |
| Pathogenic <i>BRCA2</i> mutation         | Weak   | Weak   | 2   | 0        | ref              | 0.19  |
|                                          |        | Strong | 8   | 3        | Not estimated    |       |
|                                          | Strong | Weak   | 6   | 4        | Not estimated    |       |
|                                          |        | Strong | 21  | 8        | Not estimated    |       |
| <b>First Line Chemotherapy Treatment</b> |        |        |     |          |                  |       |
| Standard treatment                       | Weak   | Weak   | 23  | 13       | ref              | 0.77  |
|                                          |        | Strong | 29  | 19       | 0.76 (0.35,1.62) |       |
|                                          | Strong | Weak   | 70  | 43       | 1.02 (0.54,1.95) |       |
|                                          |        | Strong | 185 | 119      | 1.00 (0.54,1.88) |       |

HGSOC, high-grade serous ovarian cancer; adjusted for study, age (continuous), and stage (I/II, III/IV, unknown); mutation status reflects results of germline testing; standard treatment includes patients receiving  $\geq$  four cycles of intra-venous carboplatin AUC 5 or 6 and paclitaxel 135 mg/m<sup>2</sup> or 175 mg/m<sup>2</sup> every three weeks and patients receiving  $\geq$  four cycles of intra-venous carboplatin and paclitaxel every three weeks with dose presumed to be carboplatin AUC 5 or 6 and paclitaxel 135 mg/m<sup>2</sup> or 175 mg/m<sup>2</sup>; HR, hazard ratio, CI, confidence interval.

**Supplemental Table 6. Associations of MyD88 and TLR4 expression with overall survival by histopathological groups**

| Histotype                             | Level  | MyD88      |          |                  |      | TLR4       |          |                  |      |
|---------------------------------------|--------|------------|----------|------------------|------|------------|----------|------------------|------|
|                                       |        | N Subjects | N Events | HR (95% CI)      | P    | N Subjects | N Events | HR (95% CI)      | P    |
| Grade 1 endometrioid                  | Weak   | 108        | 25       | ref              | 0.70 | 62         | 13       | ref              | 0.14 |
|                                       | Strong | 219        | 34       | 0.90 (0.52,1.55) |      | 252        | 42       | 0.59 (0.30,1.19) |      |
| Grade 2/3 endometrioid                | Weak   | 101        | 31       | ref              | 0.97 | 105        | 34       | ref              | 0.70 |
|                                       | Strong | 220        | 72       | 0.99 (0.63,1.55) |      | 182        | 59       | 1.10 (0.67,1.82) |      |
| Serous invasive                       | Weak   | 763        | 477      | ref              | 0.21 | 779        | 513      | ref              | 0.49 |
|                                       | Strong | 2201       | 1492     | 1.07 (0.96,1.19) |      | 1894       | 1303     | 1.04 (0.93,1.16) |      |
| All borderline                        | Weak   | 67         | 5        | ref              | 0.83 | 45         | 4        | ref              | 0.47 |
|                                       | Strong | 195        | 16       | 0.88 (0.29,2.69) |      | 126        | 12       | 1.63 (0.44,6.09) |      |
| All invasive                          | Weak   | 1414       | 717      | ref              | 0.31 | 1456       | 790      | ref              | 0.99 |
|                                       | Strong | 3450       | 1947     | 1.05 (0.96,1.15) |      | 2960       | 1654     | 1.00 (0.91,1.10) |      |
| Serous borderline or invasive         | Weak   | 803        | 480      | ref              | 0.21 | 792        | 514      | ref              | 0.39 |
|                                       | Strong | 2283       | 1497     | 1.07 (0.96,1.19) |      | 1922       | 1306     | 1.05 (0.94,1.17) |      |
| Mucinous borderline or Invasive       | Weak   | 118        | 38       | ref              | 0.56 | 108        | 43       | ref              | 0.14 |
|                                       | Strong | 355        | 107      | 1.14 (0.73,1.79) |      | 314        | 80       | 1.43 (0.89,2.29) |      |
| Low-grade serous or serous borderline | Weak   | 89         | 29       | ref              | 0.01 | 55         | 22       | ref              | 0.20 |
|                                       | Strong | 215        | 69       | 0.54 (0.33,0.88) |      | 131        | 57       | 0.65 (0.34,1.24) |      |
| Serous borderline                     | Weak   | 40         | 3        | ref              | 0.23 | 13         | 1        | ref              | NA   |
|                                       | Strong | 82         | 5        | 0.35 (0.06,1.94) |      | 28         | 3        | Not estimated    |      |
| Mucinous borderline                   | Weak   | 22         | 2        | ref              | 0.67 | 29         | 3        | ref              | 0.91 |
|                                       | Strong | 106        | 11       | 1.43 (0.27,7.45) |      | 90         | 9        | 1.08 (0.27,4.41) |      |

Adjusted for study, age, and stage; HR, hazard ratio, CI, confidence interval.

**Supplemental Table 7. Associations of combinations of MyD88 and TLR4 expression with overall survival by histopathological groups**

| Histotype                             | MyD88  | TLR4   | N Subjects | N events | HR (95% CI)      | P    |
|---------------------------------------|--------|--------|------------|----------|------------------|------|
| Grade 1 endometrioid                  | Weak   | Weak   | 33         | 9        | ref              | 0.47 |
|                                       |        | Strong | 69         | 14       | 0.53 (0.21,1.29) |      |
|                                       | Strong | Weak   | 27         | 4        | 0.84 (0.25,2.88) |      |
|                                       |        | Strong | 183        | 28       | 0.56 (0.25,1.27) |      |
| Grade 2/3 endometrioid                | Weak   | Weak   | 52         | 13       | ref              | 0.53 |
|                                       |        | Strong | 32         | 11       | 1.65 (0.70,3.84) |      |
|                                       | Strong | Weak   | 47         | 18       | 1.71 (0.78,3.75) |      |
|                                       |        | Strong | 149        | 48       | 1.35 (0.70,2.62) |      |
| Serous invasive                       | Weak   | Weak   | 265        | 160      | ref              | 0.32 |
|                                       |        | Strong | 337        | 225      | 1.12 (0.91,1.38) |      |
|                                       | Strong | Weak   | 475        | 324      | 1.17 (0.96,1.42) |      |
|                                       |        | Strong | 1,500      | 1,037    | 1.18 (0.99,1.41) |      |
| All borderline                        | Weak   | Weak   | 12         | 0        | ref              | NA   |
|                                       |        | Strong | 27         | 3        | Not estimated    |      |
|                                       | Strong | Weak   | 31         | 4        | Not estimated    |      |
|                                       |        | Strong | 95         | 9        | Not estimated    |      |
| All invasive                          | Weak   | Weak   | 586        | 283      | ref              | 0.11 |
|                                       |        | Strong | 581        | 305      | 1.10 (0.93,1.30) |      |
|                                       | Strong | Weak   | 809        | 470      | 1.21 (1.04,1.41) |      |
|                                       |        | Strong | 2,309      | 1,302    | 1.13 (0.98,1.30) |      |
| Serous borderline or invasive         | Weak   | Weak   | 271        | 160      | ref              | 0.27 |
|                                       |        | Strong | 344        | 227      | 1.14 (0.92,1.40) |      |
|                                       | Strong | Weak   | 480        | 325      | 1.18 (0.97,1.43) |      |
|                                       |        | Strong | 1,518      | 1,038    | 1.19 (1.00,1.42) |      |
| Mucinous borderline or invasive       | Weak   | Weak   | 33         | 14       | ref              | 0.63 |
|                                       |        | Strong | 59         | 14       | 1.57 (0.67,3.71) |      |
|                                       | Strong | Weak   | 68         | 26       | 1.14 (0.52,2.49) |      |
|                                       |        | Strong | 251        | 65       | 1.47 (0.69,3.14) |      |
| Low-grade serous or Serous borderline | Weak   | Weak   | 23         | 10       | ref              | 0.18 |
|                                       |        | Strong | 21         | 10       | 1.06 (0.38,3.02) |      |
|                                       | Strong | Weak   | 29         | 12       | 0.78 (0.28,2.18) |      |
|                                       |        | Strong | 102        | 46       | 0.54 (0.22,1.28) |      |
| Serous borderline                     | Weak   | Weak   | 6          | 0        | ref              | NA   |
|                                       |        | Strong | 7          | 2        | Not estimated    |      |
|                                       | Strong | Weak   | 5          | 1        | Not estimated    |      |
|                                       |        | Strong | 18         | 1        | Not estimated    |      |
| Mucinous borderline                   | Weak   | Weak   | 5          | 0        | ref              | NA   |
|                                       |        | Strong | 16         | 1        | Not estimated    |      |
|                                       | Strong | Weak   | 24         | 3        | Not estimated    |      |
|                                       |        | Strong | 73         | 8        | Not estimated    |      |

Adjusted for study, age (continuous), and stage (I/II, III/IV, unknown); HR, hazard ratio; CI, confidence interval; p value from unordered three degree-of-freedom test.

**Supplemental Table 8. Associations of MyD88 and TLR4 expression with progression-free survival among cases with the five most common invasive epithelial ovarian cancer histotypes**

| Histotype         | Expression | MyD88      |          |                  |      | TLR4       |          |                  |      |
|-------------------|------------|------------|----------|------------------|------|------------|----------|------------------|------|
|                   |            | N Subjects | N Events | HR (95% CI)      | P    | N Subjects | N Events | HR (95% CI)      | P    |
| High-grade serous | Weak       | 319        | 214      | ref              | 0.28 | 396        | 269      | ref              | 0.61 |
|                   | Strong     | 1,030      | 714      | 1.10 (0.93,1.29) |      | 849        | 599      | 1.04 (0.89,1.23) |      |
| Endometrioid      | Weak       | 80         | 18       | ref              | 0.61 | 63         | 13       | ref              | 0.18 |
|                   | Strong     | 216        | 47       | 1.17 (0.65,2.11) |      | 227        | 48       | 1.70 (0.78,3.71) |      |
| Clear cell        | Weak       | 96         | 38       | ref              | 0.29 | 170        | 80       | ref              | 0.46 |
|                   | Strong     | 185        | 98       | 1.25 (0.83,1.90) |      | 99         | 48       | 1.16 (0.78,1.72) |      |
| Mucinous          | Weak       | 35         | 16       | ref              | 0.27 | 42         | 23       | ref              | 0.21 |
|                   | Strong     | 119        | 43       | 1.49 (0.74,3.00) |      | 101        | 27       | 1.84 (0.71,4.78) |      |
| Low-grade serous  | Weak       | 18         | 11       | ref              | 0.06 | 20         | 13       | ref              | 0.05 |
|                   | Strong     | 48         | 27       | 0.41 (0.16,1.05) |      | 43         | 25       | 0.32 (0.10,0.99) |      |

Adjusted for study, age (continuous), and stage (I/II, III/IV, unknown); HR, hazard ratio; CI, confidence interval.

**Supplemental Table 9. Associations of combinations of MyD88 and TLR4 expression with progression-free survival among cases with the five most common invasive epithelial ovarian cancer histotypes**

| <b>Histotype</b>  | <b>MyD88</b> | <b>TLR4</b> | <b>N Subjects</b> | <b>N events</b> | <b>HR (95% CI)</b> | <b>P</b> |
|-------------------|--------------|-------------|-------------------|-----------------|--------------------|----------|
| High-grade serous | Weak         | Weak        | 122               | 80              | ref                | 0.60     |
|                   |              | Strong      | 123               | 87              | 0.95 (0.68,1.31)   |          |
|                   | Strong       | Weak        | 256               | 176             | 1.03 (0.78,1.36)   |          |
|                   |              | Strong      | 700               | 492             | 1.10 (0.84,1.43)   |          |
| Endometrioid      | Weak         | Weak        | 30                | 6               | ref                | 0.49     |
|                   |              | Strong      | 47                | 9               | 2.32 (0.71,7.51)   |          |
|                   | Strong       | Weak        | 32                | 7               | 1.80 (0.54,5.99)   |          |
|                   |              | Strong      | 180               | 39              | 2.19 (0.80,5.94)   |          |
| Clear cell        | Weak         | Weak        | 77                | 30              | ref                | 0.20     |
|                   |              | Strong      | 13                | 3               | 0.98 (0.29,3.31)   |          |
|                   | Strong       | Weak        | 93                | 50              | 1.65 (0.98,2.78)   |          |
|                   |              | Strong      | 86                | 45              | 1.71 (0.98,2.97)   |          |
| Mucinous          | Weak         | Weak        | 16                | 10              | ref                | 0.45     |
|                   |              | Strong      | 15                | 4               | 2.85 (0.63,13.0)   |          |
|                   | Strong       | Weak        | 26                | 13              | 1.75 (0.59,5.12)   |          |
|                   |              | Strong      | 86                | 23              | 2.69 (0.78,9.28)   |          |
| Low-grade serous  | Weak         | Weak        | 11                | 8               | ref                | 0.14     |
|                   |              | Strong      | 6                 | 3               | 0.67 (0.12,3.71)   |          |
|                   | Strong       | Weak        | 9                 | 5               | 0.84 (0.18,3.83)   |          |
|                   |              | Strong      | 36                | 22              | 0.25 (0.07,0.90)   |          |

Adjusted for study, age (continuous), and stage (I/II, III/IV, unknown); HR, hazard ratio; CI, confidence interval; p value from unordered three degree-of-freedom test.
